# Supplementary material for: Role of asymptomatic COVID-19 cases in viral transmission: Findings from a hierarchical community contact network model1
Source: bioRxiv or medRxiv preprint supplement (doi:10.1101/2020.11.21.20236034), 2020-11-23
Supplement: Supplementary file [file media-1.pdf]

## Supplementary

**Table 1. Estimated incubation period from selected studies.**

| Author                                                   | Incubation period | Uncertainty         | Source                    |
|----------------------------------------------------------|-------------------|---------------------|---------------------------|
| Mike(Mike, 2020)                                         | 5.40              | 4.20-6.70 (95% CI)  | NA                        |
| Liu et al. (Liu et al., 2020)                            | 4.80              | 2.20-7.40           | bioRxiv                   |
| Akhmetzhanov et al. (Akhmetzhanov et al., 2020)          | 5.10              | 2.00-14.00 (95% CI) | medRxiv                   |
| Sun et al.(Sun, Chen, & Viboud, 2020)                    | 4.50              | 3.00–5.50 (IQRs)    | The Lancet Digital Health |
| Read et al.(Read, Bridgen, Cummings, Ho, & Jewell, 2020) | 3.00              | 0.00-6.00           | medRxiv                   |
| Li et al.(Hui et al., 2020)                              | 5.20              | 4.10-7.00 (95% CI)  | NEJM                      |
| Guan et al.(W.-j. Guan et al., 2020)                     | 3.00              | 0.00-24.00          | medRxiv                   |
| Sanche et al.(Sanche et al., 2020)                       | 4.20              | 3.50-5.10 (95% CI)  | medRxiv                   |
| Zhang et al.(Zhang et al., 2020)                         | 5.20              | 1.80-12.40          | medRxiv                   |
| Tindale et al.(Tindale et                                | 9.00              | 7.92-10.20 (95% CI) | medRxiv                   |

|                                                      |      |                    |              |
|------------------------------------------------------|------|--------------------|--------------|
| al., 2020)                                           |      |                    |              |
| Ping(Ping, 2020)                                     | 8.06 | 6.89-9.36 (95% CI) | medRxiv      |
| Jing et al.(Jing et al., 2020)                       | 8.13 | 7.37-8.91 (95% CI) | medRxiv      |
| Li et al.(Li et al., 2020)                           | 3.69 | 3.28-4.03 (95% CI) | Science      |
| Li et al.(Li et al., 2020)                           | 3.6  | 3.41-3.91 (95% CI) | Science      |
| Li et al.(Li et al., 2020)                           | 3.44 | 3.26-4.06 (95% CI) | Science      |
| Bi et al.(Bi et al., 2020)                           | 4.80 | 4.20-5.40 (95% CI) | medRxiv      |
| Guan et al.(W. Guan et al., 2020)                    | 4.00 | 2.00-7.00 (IQRs)   | NEJM         |
| Lauer et al.(Lauer et al., 2020)                     | 5.20 | 4.40-6.00 (95% CI) | medRxiv      |
| Backer et al.(Backer, Klinkenberg, & Wallinga, 2020) | 6.40 | 5.60-7.70 (95% CI) | EuroSurveill |

## Calculation of $R_0$ in the model

Mathematical properties: For a non-negative stochastic variable  $a$  that is distributed according to a probability density function  $g(a)$ , the moment generating function is defined as  $M_{g(a)}(z) = \int_{a=0}^{\infty} e^{za} g(a) da$ . When the integral is finite, there is a unique relation between the probability density function and its moment generating function. The moment generating functions have a number of mathematical properties.

In the paper (Wallinga & Lipsitch, 2007) have exploited the following properties: When the random variable  $a$ , distributed according to  $g(a)$ , can be thought of as the sum of two independent random variables  $a_1$  and  $a_2$ , such that  $a = a_1 + a_2$ , with  $a_1$  and  $a_2$  distributed according to  $f(a_1)$  and  $h(a_2)$ , the moment generating function for the random variable  $a$  can be composed of the moment generating function for  $a_1$  and  $a_2$ :  $M_{g(a)}(z) = M_{f(a)}(z) \times M_{h(a)}(z)$ .

The moment generating function for the generation interval can be composed from moment generating functions for the durations of successive stages in the infection cycle. We introduce two distributions for the successive stages:  $f(a)$  gives the duration from infection to becoming infectious, and  $h(a)$  gives the duration from becoming infectious to infection. The moment generating function for the composite generation interval is then given by:

$$M_{g(a)} = M_{f(a)} \times M_{h(a)}$$

In our model, the incubation period obeys the normal distribution, and the infectious period obeys the exponential distribution.

$$R = \frac{1}{M(z)} = \frac{1}{M_{f(a)}(z)} \cdot \frac{1}{M_{h(a)}(z)}$$

$$\frac{1}{M_{f(a)}(z)} = e^{\mu r - \frac{1}{2}\sigma^2 r^2} \quad [\text{f(a) incubation period obeys the normal distribution}]$$

$$\frac{1}{M_{h(a)}(z)} = \left(1 + \frac{r}{b}\right) \quad [\text{h(a) infectious period obeys the exponential distribution}]$$

$$\text{Therefore, } R = e^{\mu r - \frac{1}{2}\sigma^2 r^2} \cdot \left(1 + \frac{r}{b}\right).$$

## References

- Akhmetzhanov, A. R., Mizumoto, K., Jung, S.-m., Linton, N. M., Omori, R., & Nishiura, H. (2020). Epidemiological characteristics of novel coronavirus infection: A statistical analysis of publicly available case data. *medRxiv*.
- Backer, J. A., Klinkenberg, D., & Wallinga, J. (2020). Incubation period of 2019 novel coronavirus (2019-nCoV) infections among travellers from Wuhan, China, 20–28 January 2020. *Eurosurveillance*, *25*(5), 2000062.
- Bi, Q., Wu, Y., Mei, S., Ye, C., Zou, X., Zhang, Z., Feng, T. (2020). Epidemiology and Transmission of COVID-19 in Shenzhen China: Analysis of 391 cases and 1,286 of their close contacts. *medRxiv*, 2020.2003.2003.20028423. doi:10.1101/2020.03.03.20028423
- Guan, W.-j., Ni, Z.-y., Hu, Y., Liang, W.-h., Ou, C.-q., He, J.-x., Zhong, N.-s. (2020). Clinical characteristics of 2019 novel coronavirus infection in China. *medRxiv*, 2020.2002.2006.20020974. doi:10.1101/2020.02.06.20020974
- Guan, W., Ni, Z., Hu, Y., Liang, W., Ou, C., He, J., Hui, D. S. C. (2020). Clinical Characteristics of Coronavirus Disease 2019 in China. *The New England Journal of Medicine*.
- Hui, D. S., E, I. A., Madani, T. A., Ntoumi, F., Kock, R., Dar, O., Petersen, E. (2020). The continuing 2019-nCoV epidemic threat of novel coronaviruses to global health - The latest 2019 novel coronavirus outbreak in Wuhan, China. *Int J Infect Dis*, *91*, 264-266. doi:10.1016/j.ijid.2020.01.009
- Jing, Q., You, C., Lin, Q., Hu, T., Yu, S., & Zhou, X.-H. (2020). Estimation of incubation period distribution of COVID-19 using disease onset forward time: a novel cross-sectional and forward follow-up study. *medRxiv*, 2020.2003.2006.20032417. doi:10.1101/2020.03.06.20032417
- Lauer, S. A., Grantz, K. H., Bi, Q., Jones, F. K., Zheng, Q., Meredith, H., Lessler, J. (2020). The incubation period of 2019-nCoV from publicly reported confirmed cases: estimation and application. *medRxiv*, 2020.2002.2002.20020016. doi:10.1101/2020.02.02.20020016
- Li, R., Pei, S., Chen, B., Song, Y., Zhang, T., Yang, W., & Shaman, J. (2020). Substantial undocumented infection facilitates the rapid dissemination of novel coronavirus (COVID-19). *medRxiv*, 2020.2002.2014.20023127. doi:10.1101/2020.02.14.20023127
- Liu, T., Hu, J., Kang, M., Lin, L., Zhong, H., Xiao, J., Rong, Z. (2020). Transmission dynamics of 2019 novel coronavirus (2019-nCoV).
- Mike, F. (2020). nCoV: incubation period distribution.
- Ping, K. (2020). Epidemiologic Characteristics of COVID-19 in Guizhou, China. *medRxiv*, 2020.2003.2001.20028944. doi:10.1101/2020.03.01.20028944
- Read, J. M., Bridgen, J. R., Cummings, D. A., Ho, A., & Jewell, C. P. (2020). Novel coronavirus 2019-nCoV: early estimation of epidemiological parameters and epidemic predictions. *medRxiv*, 2020.2001.2023.20018549. doi:10.1101/2020.01.23.20018549
- Sanche, S., Lin, Y. T., Xu, C., Romero-Severson, E., Hengartner, N., & Ke, R. (2020). The Novel Coronavirus, 2019-nCoV, is Highly Contagious and More Infectious Than Initially Estimated. *medRxiv*, 2020.2002.2007.20021154. doi:10.1101/2020.02.07.20021154
- Sun, K., Chen, J., & Viboud, C. (2020). Early epidemiological analysis of the coronavirus disease 2019 outbreak based on crowdsourced data: a population-level observational study. *The Lancet Digital Health*, *2*(4), e201-e208. doi:10.1016/S2589-7500(20)30026-1
- Tindale, L., Coombe, M., Stockdale, J. E., Garlock, E., Lau, W. Y. V., Saraswat, M., Colijn, C. (2020).

Transmission interval estimates suggest pre-symptomatic spread of COVID-19. *medRxiv*, 2020.2003.2003.20029983. doi:10.1101/2020.03.03.20029983

Wallinga, J., & Lipsitch, M. (2007). How generation intervals shape the relationship between growth rates and reproductive numbers. *Proceedings of the Royal Society B: Biological Sciences*, 274(1609), 599-604.

Zhang, J., Litvinova, M., Wang, W., Wang, Y., Deng, X., Chen, X., Yu, H. (2020). Evolving epidemiology of novel coronavirus diseases 2019 and possible interruption of local transmission outside Hubei Province in China: a descriptive and modeling study. *medRxiv*, 2020.2002.2021.20026328. doi:10.1101/2020.02.21.20026328
